# Supplementary material
Source: HighWire-hosted journal article supplement (http://www.cmaj.ca/highwire/filestream/59168/field_highwire_adjunct_files/5/birth-urquia-6-at.pdf)
Supplement: birth-urquia-6-at.pdf [file birth-urquia-6-at.pdf]

**Appendix 6 (as supplied by the authors): Risk of adverse neonatal outcomes according to whether infants were classified as large for gestational age (LGA) ( $\geq 90$ th percentile) by the Canadian birth-weight curve or by world region-specific birth-weight curves, or both, relative to non-LGA infants**

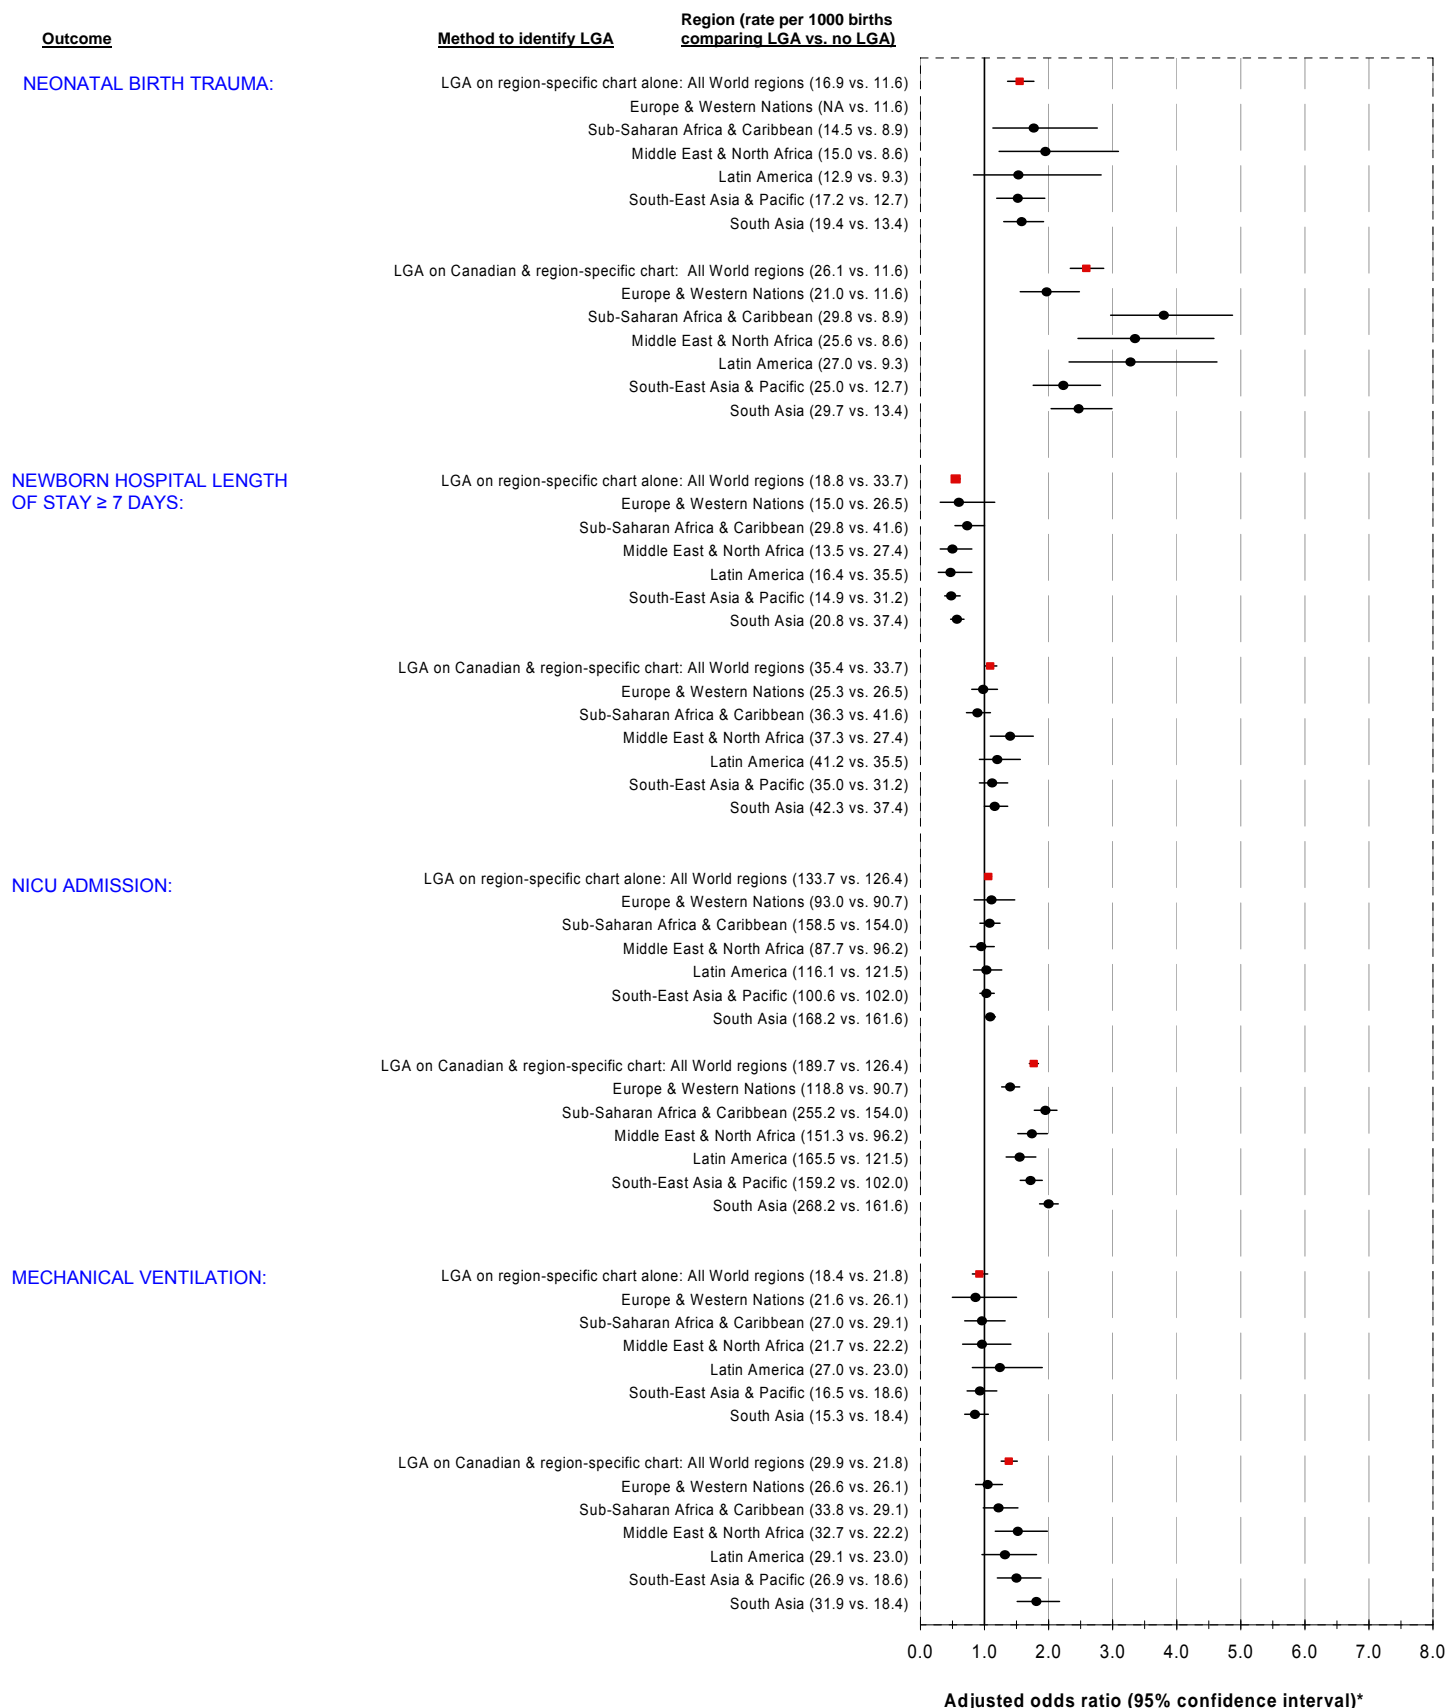

Note: NA = data suppression required because of low counts.

\*Adjusted for maternal age, parity, year of delivery, maternal education, marital status, refugee status, knowledge of Canadian languages, duration of residence in Canada, world region of birth and neighborhood income quintile.
